Correction

# Correction: MIB1 mutations reduce notch signaling activation and contribute to congenital heart disease

The authors of article “MIB1 Mutations Reduce Notch Signaling Activation and Contribute to Congenital Heart Disease” (Clin Sci (2018) 132(23); <https://doi.org/10.1042/CS20180732>) had incorporated incorrect blots in the  $\alpha$ -Flag panels of Figure 4B during their figure build. Below is a revised Figure 4 which includes the correct panels.

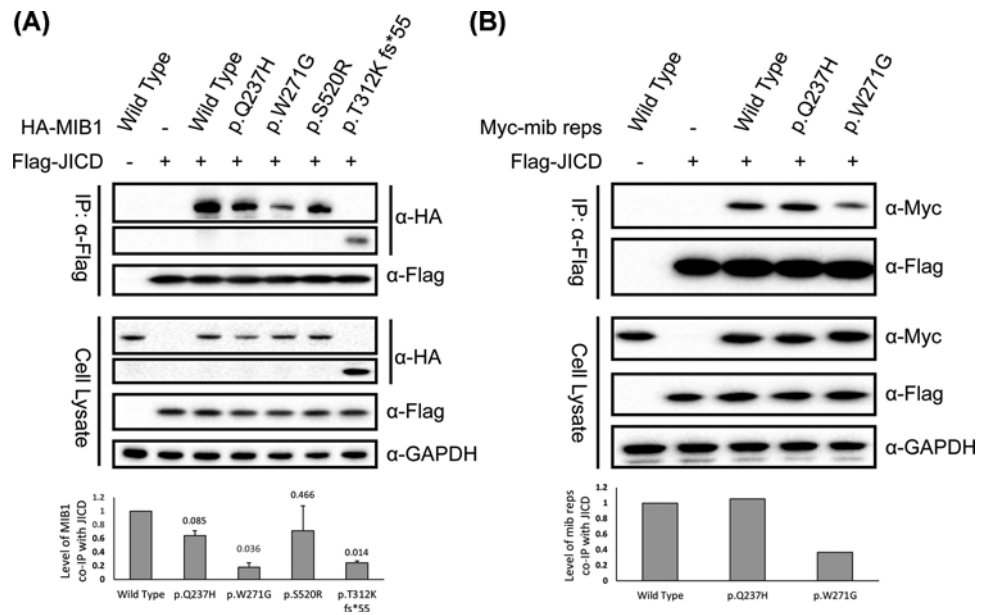

Downloaded from <http://port.silverchair.com/doi/insci/article-pdf/134/1/186-196/66/cs-2018-0732-cor.pdf> by guest on 24 April 2024
